# Supplementary material for: On Testing Dependence between Time to Failure and Cause of Failure when Causes of Failure Are Missing
Source: PLoS One. 2007 Dec 5;2(12):e1255. doi: 10.1371/journal.pone.0001255 (PMC2092381; doi:10.1371/journal.pone.0001255)
Supplement: Text S3 — SAS source code for Example 3 (0.03 MB DOC) [file pone.0001255.s003.doc]

**Text S3: SAS source code for Example 3**

The SAS source code for testing independence of and for Nair's data using the three tests is given here. The missing data are artificially generated for various values of The input to the arguments of the SAS macro is the name of the input SAS dataset and the size of the sample.

%MACRO ustat(indat,nsample);

/*-Creating missing data indicator-*/

%DO i=5 %TO 10 %BY 1;

%LET p = &i./10;

%DO rep = 1 %TO 1000;

DATA gumbel(KEEP = t d o);

SET &indat.;

IF RANUNI(900 + 5*&rep.) <= 1 - &p. THEN o = 0;

ELSE o = 1;

RUN;

PROC SORT DATA = gumbel;BY t;RUN;

DATA gumbel;

SET gumbel;

BY t;

rank = _n_; /* Ranks of T's from the entire sample */

pqd1 = (rank - 1)*o*d;

pqd2 = (rank - 1)*(1 - o)*0.5;

pqd = (pqd1 + pqd2)*(2/(&nsample.*(&nsample. - 1)));

RUN;

/*-Calculation of Kendall's Tau U-satat-*/

PROC SORT DATA = gumbel(WHERE = (d = 1 AND o = 1)) OUT = x;BY t;RUN;

PROC SORT DATA = gumbel(WHERE=(d = 0 AND o = 1)) OUT = y;BY t;RUN;

PROC SORT DATA = gumbel(WHERE = (o = 1)) OUT = xy;BY t;RUN;

PROC SORT DATA = gumbel(WHERE = ((d = 1 AND o = 1) OR (o = 0))) OUT = xz;BY t;RUN;

PROC SORT DATA=gumbel(WHERE = ((d = 0 AND o = 1) OR (o = 0))) OUT = yz;BY t;RUN;

DATA x;

SET x;

rankx = _n_;

RUN;

DATA xy;S

ET xy;

rankxy = _n_;

RUN;

DATA xz;

SET xz;

rankxz = _n_;

RUN;

DATA y;

SET y;

ranky = _n_;

RUN;

DATA yz;

SET yz;

rankyz = _n_;

RUN;

DATA termx;

MERGE x xy xz;

BY t;

term1 = 2*(rankxy - rankx) + (rankxz - rankx);

RUN;

DATA termy;

MERGE y yz;

BY t;

term2 = -1*(rankyz - ranky);

RUN;

PROC SORT DATA = gumbel;BY t;RUN;

PROC SORT DATA = termx;BY t;RUN;

PROC SORT DATA = termy;BY t;RUN;

DATA gumbel;

MERGE gumbel termx termy;

BY t;

n1 = o*d;

n2 = o*(1 - d);

n3 = 1 - o;

RUN;

PROC MEANS DATA = gumbel SUM NOPRINT;

OUTPUT out = ustat SUM =;

VAR PQD o d n1 n2 n3 term1 term2;

RUN;

DATA ustat(KEEP = probo repeat upqd ukendall);

SET ustat;

/* variance of PQD and Kendall's U-stats */

var = (4/3)*(o/&nsample.)*(o/&nsample.)*(d/&nsample.)*(1 - d/&nsample.)

+ (1/3)*(o/&nsample.)*(1 - o/&nsample.);

/* expectation of PQD U-stat */

epqd = (o/&nsample.)*(d/&nsample.) + (1 - o/&nsample.)/2;

upqd = sqrt(&nsample./var)*(pqd - epqd);

ukendall = sqrt(&nsample./var)*(term1 + term2 - n1*n2 + n2*n3/2 - n1*n3/2)

*(2/(&nsample.*(&nsample. - 1)));

probo = &p.;

repeat = &rep.;

RUN;

/*-Dataset containing normalised test statistics of each iteration-*/

PROC datasets;

APPEND BASE = ustat_dep DATA = ustat FORCE;

RUN;

PROC datasets LIBRARY = work;

DELETE ustat termx termy x xy xz y yz;

RUN;

%END;

%END;

%MEND;

/*-Reading real data (replace this step with the data to be analysed)-*/

DATA nair;

INPUT timea $ di @@;

CARDS;

1.151 0 1.577 0 2.015 0 2.199 0 2.547 1

1.17 0 1.584 0 2.076 0 2.227 1 2.548 1

1.248 0 1.677 1 2.109 1 2.25 0 2.738 0

1.331 0 1.695 1 2.116 0 2.254 1 2.794 1

1.381 0 1.71 1 2.119 0 2.261 0 2.91 1

1.499 1 1.955 0 2.135 1 2.349 0 3.015 1

1.508 0 1.965 1 2.197 1 2.369 1 3.017 1

1.534 0 2.012 0

;

RUN;

DATA all(DROP = timea di);

SET nair;

t = timea*1;

d = di*1;

RUN;

/ --- Macro call --- */

%ustat(all,37);

title'U-statistics values';

PROC PRINT DATA = ustat_dep;RUN;

DATA power_u;

SET ustat_dep;

IF upqd > 1.64 THEN power_pqd = 1;

ELSE power_pqd = 0;

IF ukendall > 1.96 OR ukendall < -1.96 THEN power_ken = 1;

ELSE power_ken = 0;

IF ukendall > 1.64 THEN power_ken1 = 1;

ELSE power_ken1 = 0;

RUN;

PROC SORT DATA = power_u;BY probo;RUN;

PROC MEANS DATA = power_u MEAN;

BY probo;

OUTPUT OUT = empower_ustat MEAN =;

VAR power_pqd power_ken power_ken1;

RUN;

title'Empirical powers for three U-statistics --- */

PROC PRINT DATA = empower_ustat;RUN;
